# Supplementary material
Source: PubMed Central journal article supplement (PMC9360352)
Supplement: 11606_2021_7292_MOESM2_ESM.pdf [file 11606_2021_7292_MOESM2_ESM.pdf]

# In-patient safe sleep promotion

Christine Soong

# On-call page at 22:00

- “Ms S on 10S is having trouble sleeping, can we have an order for Ativan?”

# Sleep in Hospital

- Generally not good for a variety of reasons
  - Noise, pain, interruption, etc.
- Particularly on GIM floors!

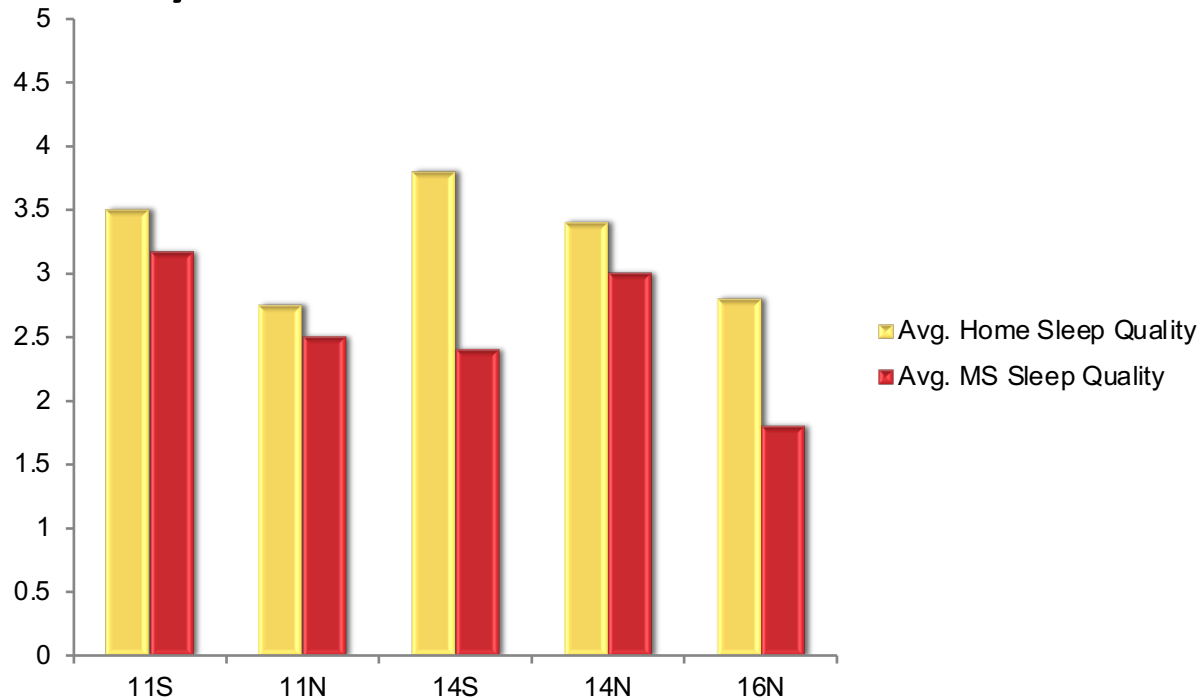

# Factors disturbing sleep – 16N

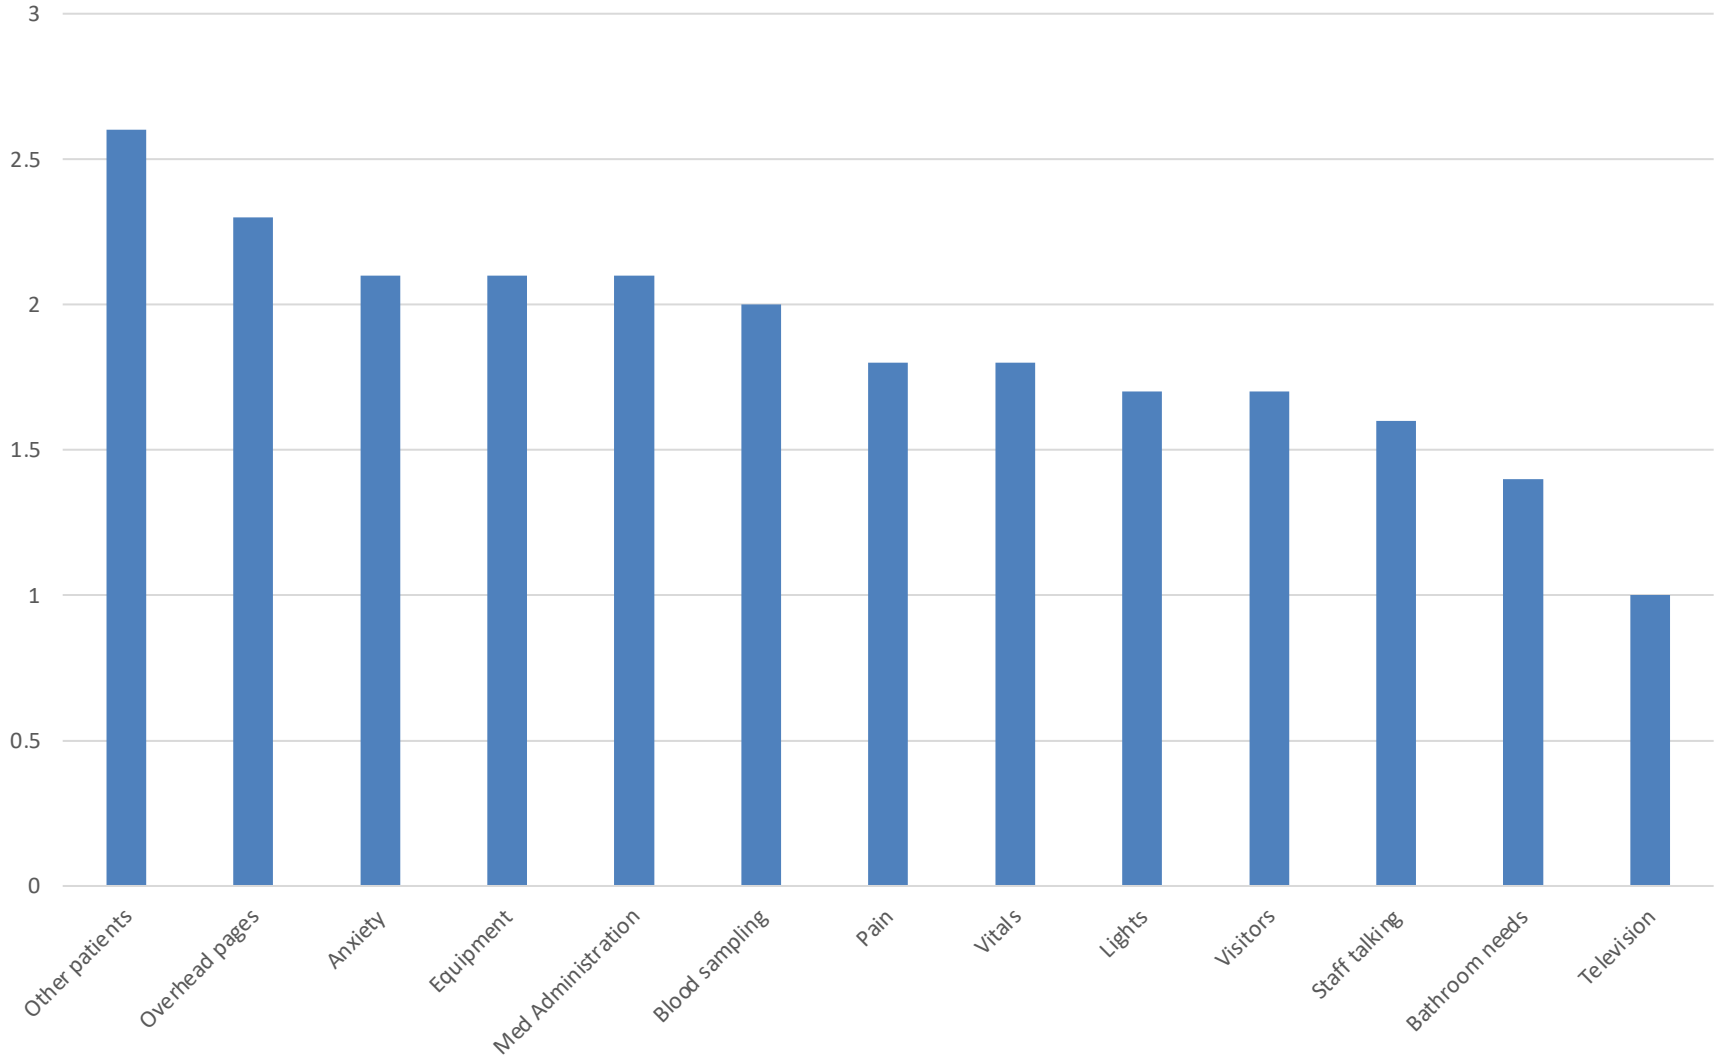

# UHN point prevalence data

| Unit         | Proportion of BZD/zopiclone naïve patients prescribed new sedative |
|--------------|--------------------------------------------------------------------|
| TGH 5B       | 22%                                                                |
| TWH 3B       | 19%                                                                |
| TGH 13 Eaton | 14%                                                                |
| TGH 14 Eaton | 20%                                                                |
| MSH cardio   | 33% → < 5%                                                         |

$NNT = 13$

$NNH = 6$

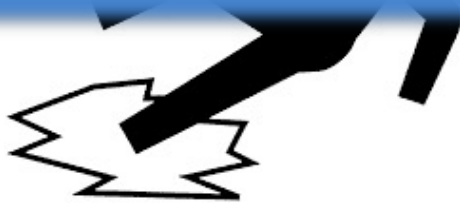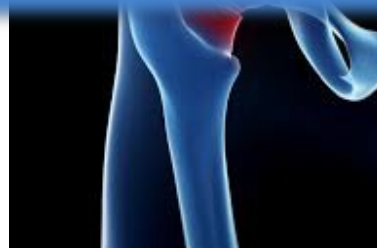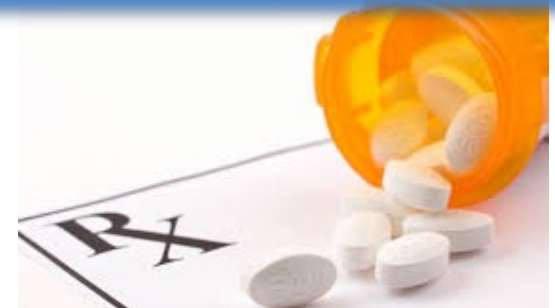

# Safe sleep project

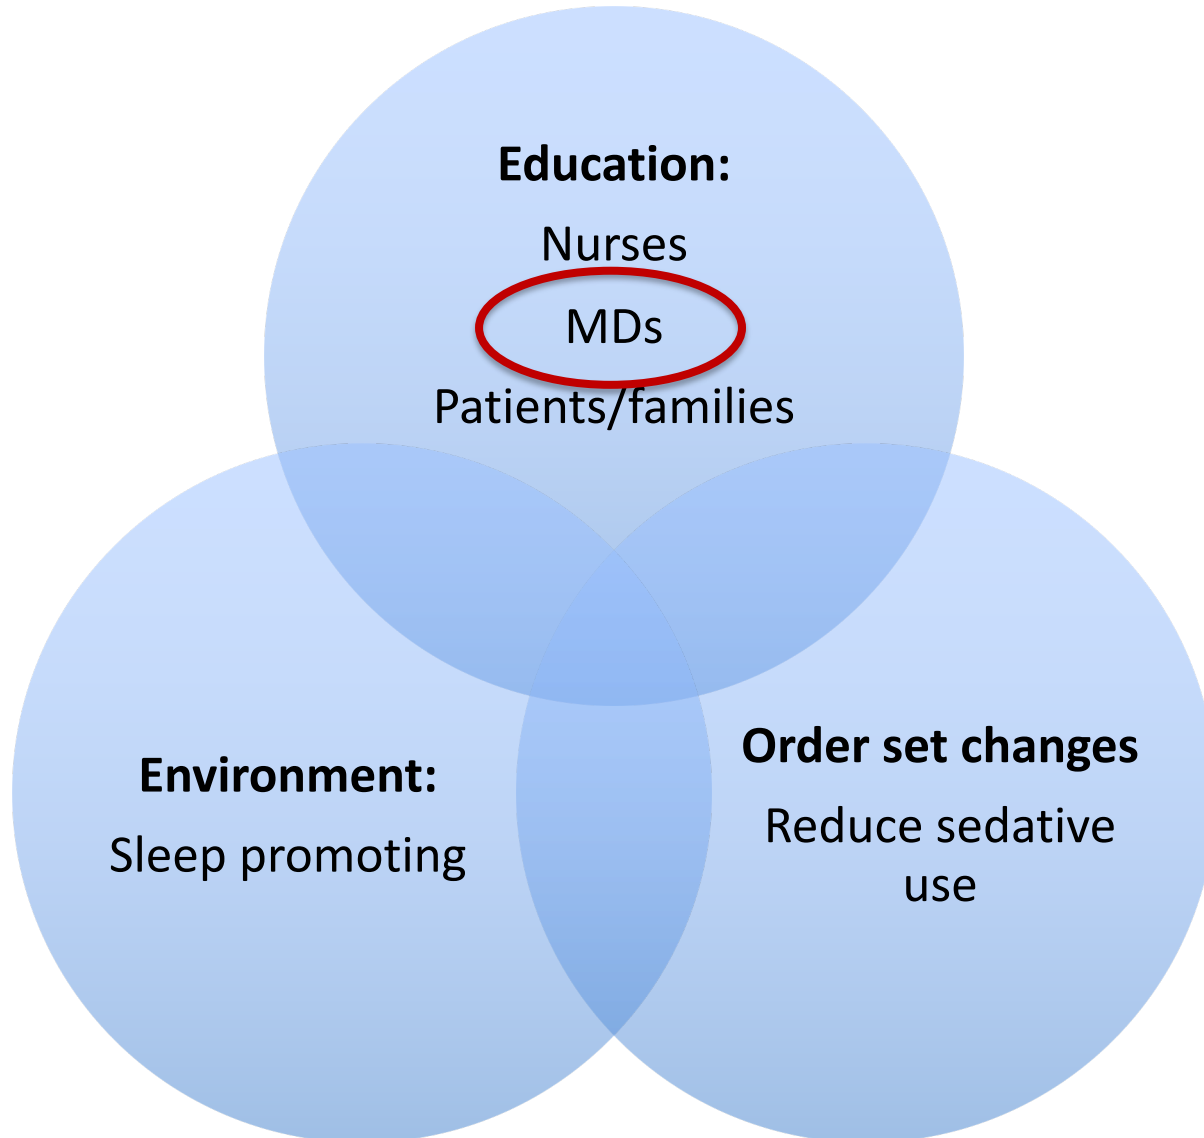

# Strategies for improvement

- If paged overnight consider non-pharmacologic strategies:
  - Ear plugs
  - Face mask
  - Analgesia (if patient is in pain)
  - Nicotine patch (if patient smokes)
- Negotiation:
  - Decreasing the frequency of vitals (if appropriate)
  - Timing of medication administration
  - Explain your reasoning
  - Stall!!
- Melatonin – lacks inpatient evidence but may help and relatively benign

Reduces  
sedatives by  
50%!

Strong  
placebo  
effect!



When might a sleep aid be appropriate?

Non-pharm strategies have failed

+

Insomnia is negatively impacting on patient's daytime function

# How to initiate a sleep aid?

1. Start at the lowest possible dose
2. Use for shortest possible duration
  - One-time dose with monitoring of effects
3. Watch for adverse effects
  - delirium, “hangover effect”

# Thank you...

- for keeping our patients' safety in mind
- for promoting safe sleep hygiene
- for thinking twice about BZD and zopiclone!

Concerns/questions: [Csoong@mtsinai.on.ca](mailto:Csoong@mtsinai.on.ca)

# In-patient safe sleep promotion Sedative Reduction Initiative

14S

Yuna Lee, PI

Christine Soong, PI

Cheryl Ethier, RC

Faten Sallam, RA

July 2018

# Aim

To reduce the monthly proportion of BSH-naïve inpatients on medicine and cardiology who are prescribed a new BSH in hospital for sleep by 20% in 1 year

# DID YOU KNOW?

**CHOOSING WISELY CANADA: Don't use benzodiazepines or other sedative-hypnotics in older adults as first choice for insomnia**

New exposure to sedatives **triples** risk for falling

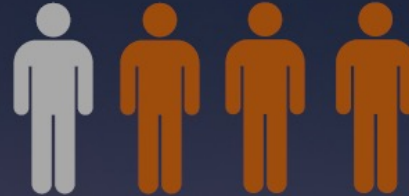

New exposure to sedatives **quintuples** risk of confusion or delirium

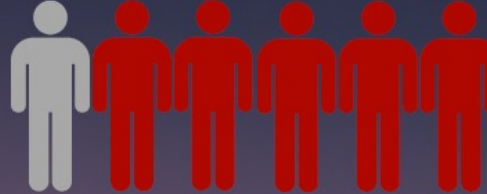

Sedatives only increase total sleep time by 25.2 minutes

In-hospital sedative use can lead to chronic dependence

Sedatives are linked to pneumonia and dementia

## DO NO HARM

PRACTICE SLEEP HYGIENE.

# "SHH"

## Sleep Hygiene in Hospital

- ✓ The ward designates quiet time from 10pm-6am
- ✓ Timing of routine vitals can be changed to 6am/2pm/10pm
- ✓ Avoid diuretic doses after 4pm
- ✓ Avoid all procedures during quiet time when possible
- ✓ Dim the lights at 10pm
- ✓ Set pagers to vibrate setting
- ✓ Perform bedtime routine with patients  
(vitals, meds, toileting, adequate blankets/pillows, dim lights, close door/curtain)

### WHAT IF MY PATIENT STILL CAN'T SLEEP?

Offer a warm beverage, back rub or warm blanket

↓  
Address unmet needs (toileting, pain, hunger, lights, noise)

↓  
If there have been many attempts, AND daytime function is impaired, offer a trial of Melatonin

# % of Naïve pts on Sedatives

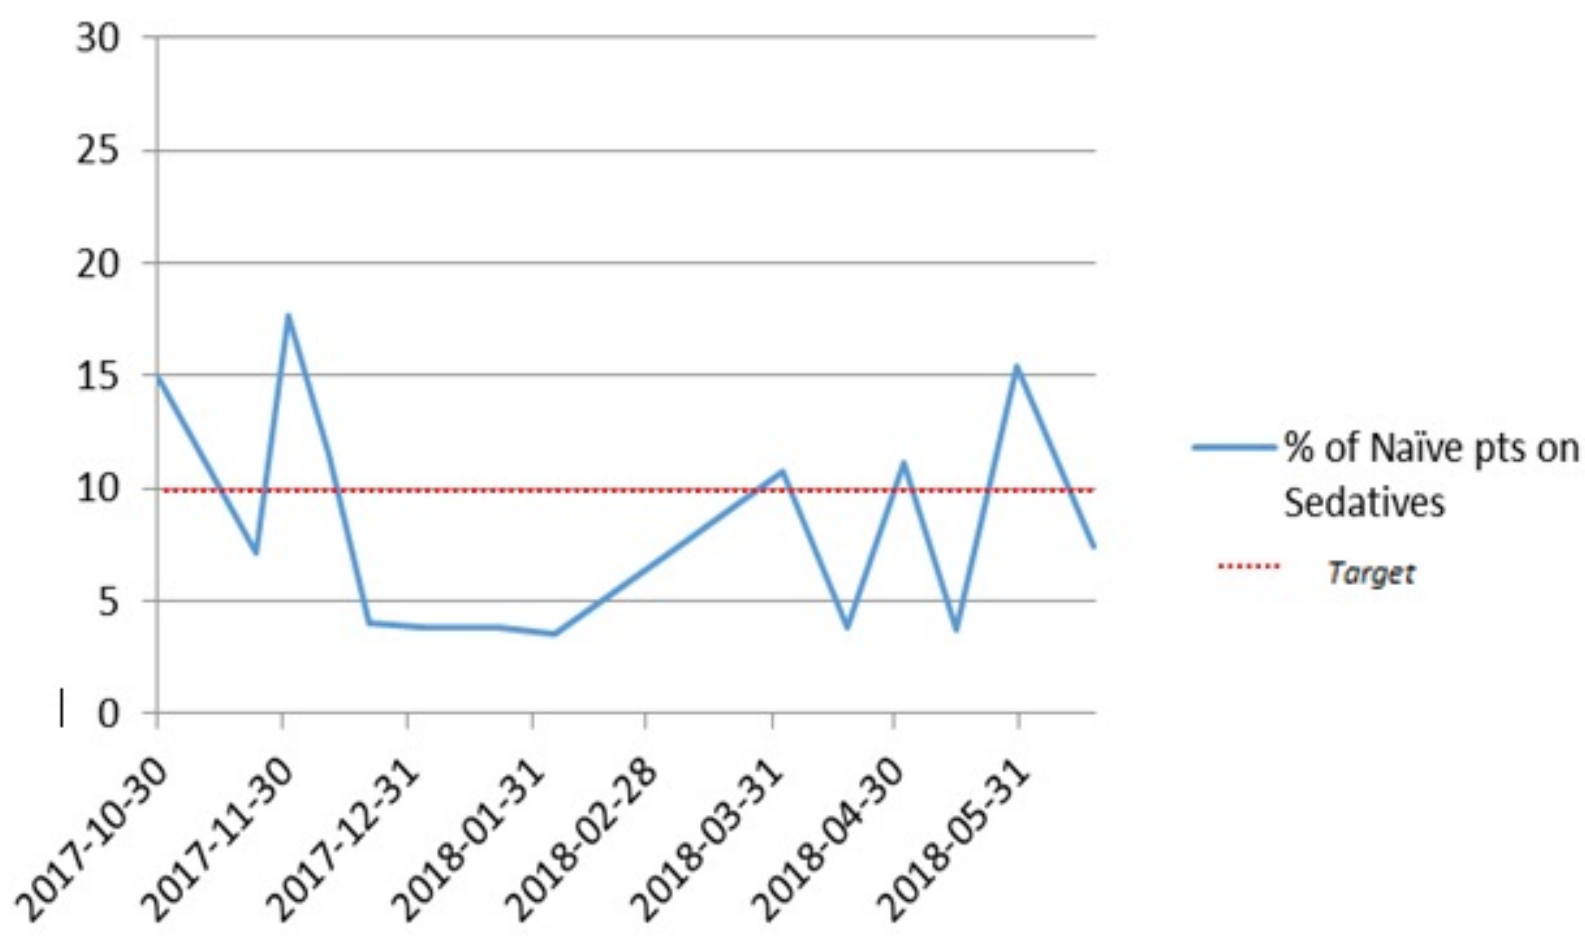



# Sustainability

## Things to consider

### PROCESS:

- Sleep Hygiene
- Audits
- Does the team know about this?
- This is QI, not research

### STAFF:

- Keep leadership informed
- Huddles
- New Staff

### ORGANISATION:

- Other safety goals, i.e. falls, delirium, high risk medications.
