# Supplementary material
Source: PubMed Central journal article supplement (PMC9360352)

Hospital 1 Statistical Process Control Chart of Proportion of Patients with New Sedative Starts in Control and Intervention periods

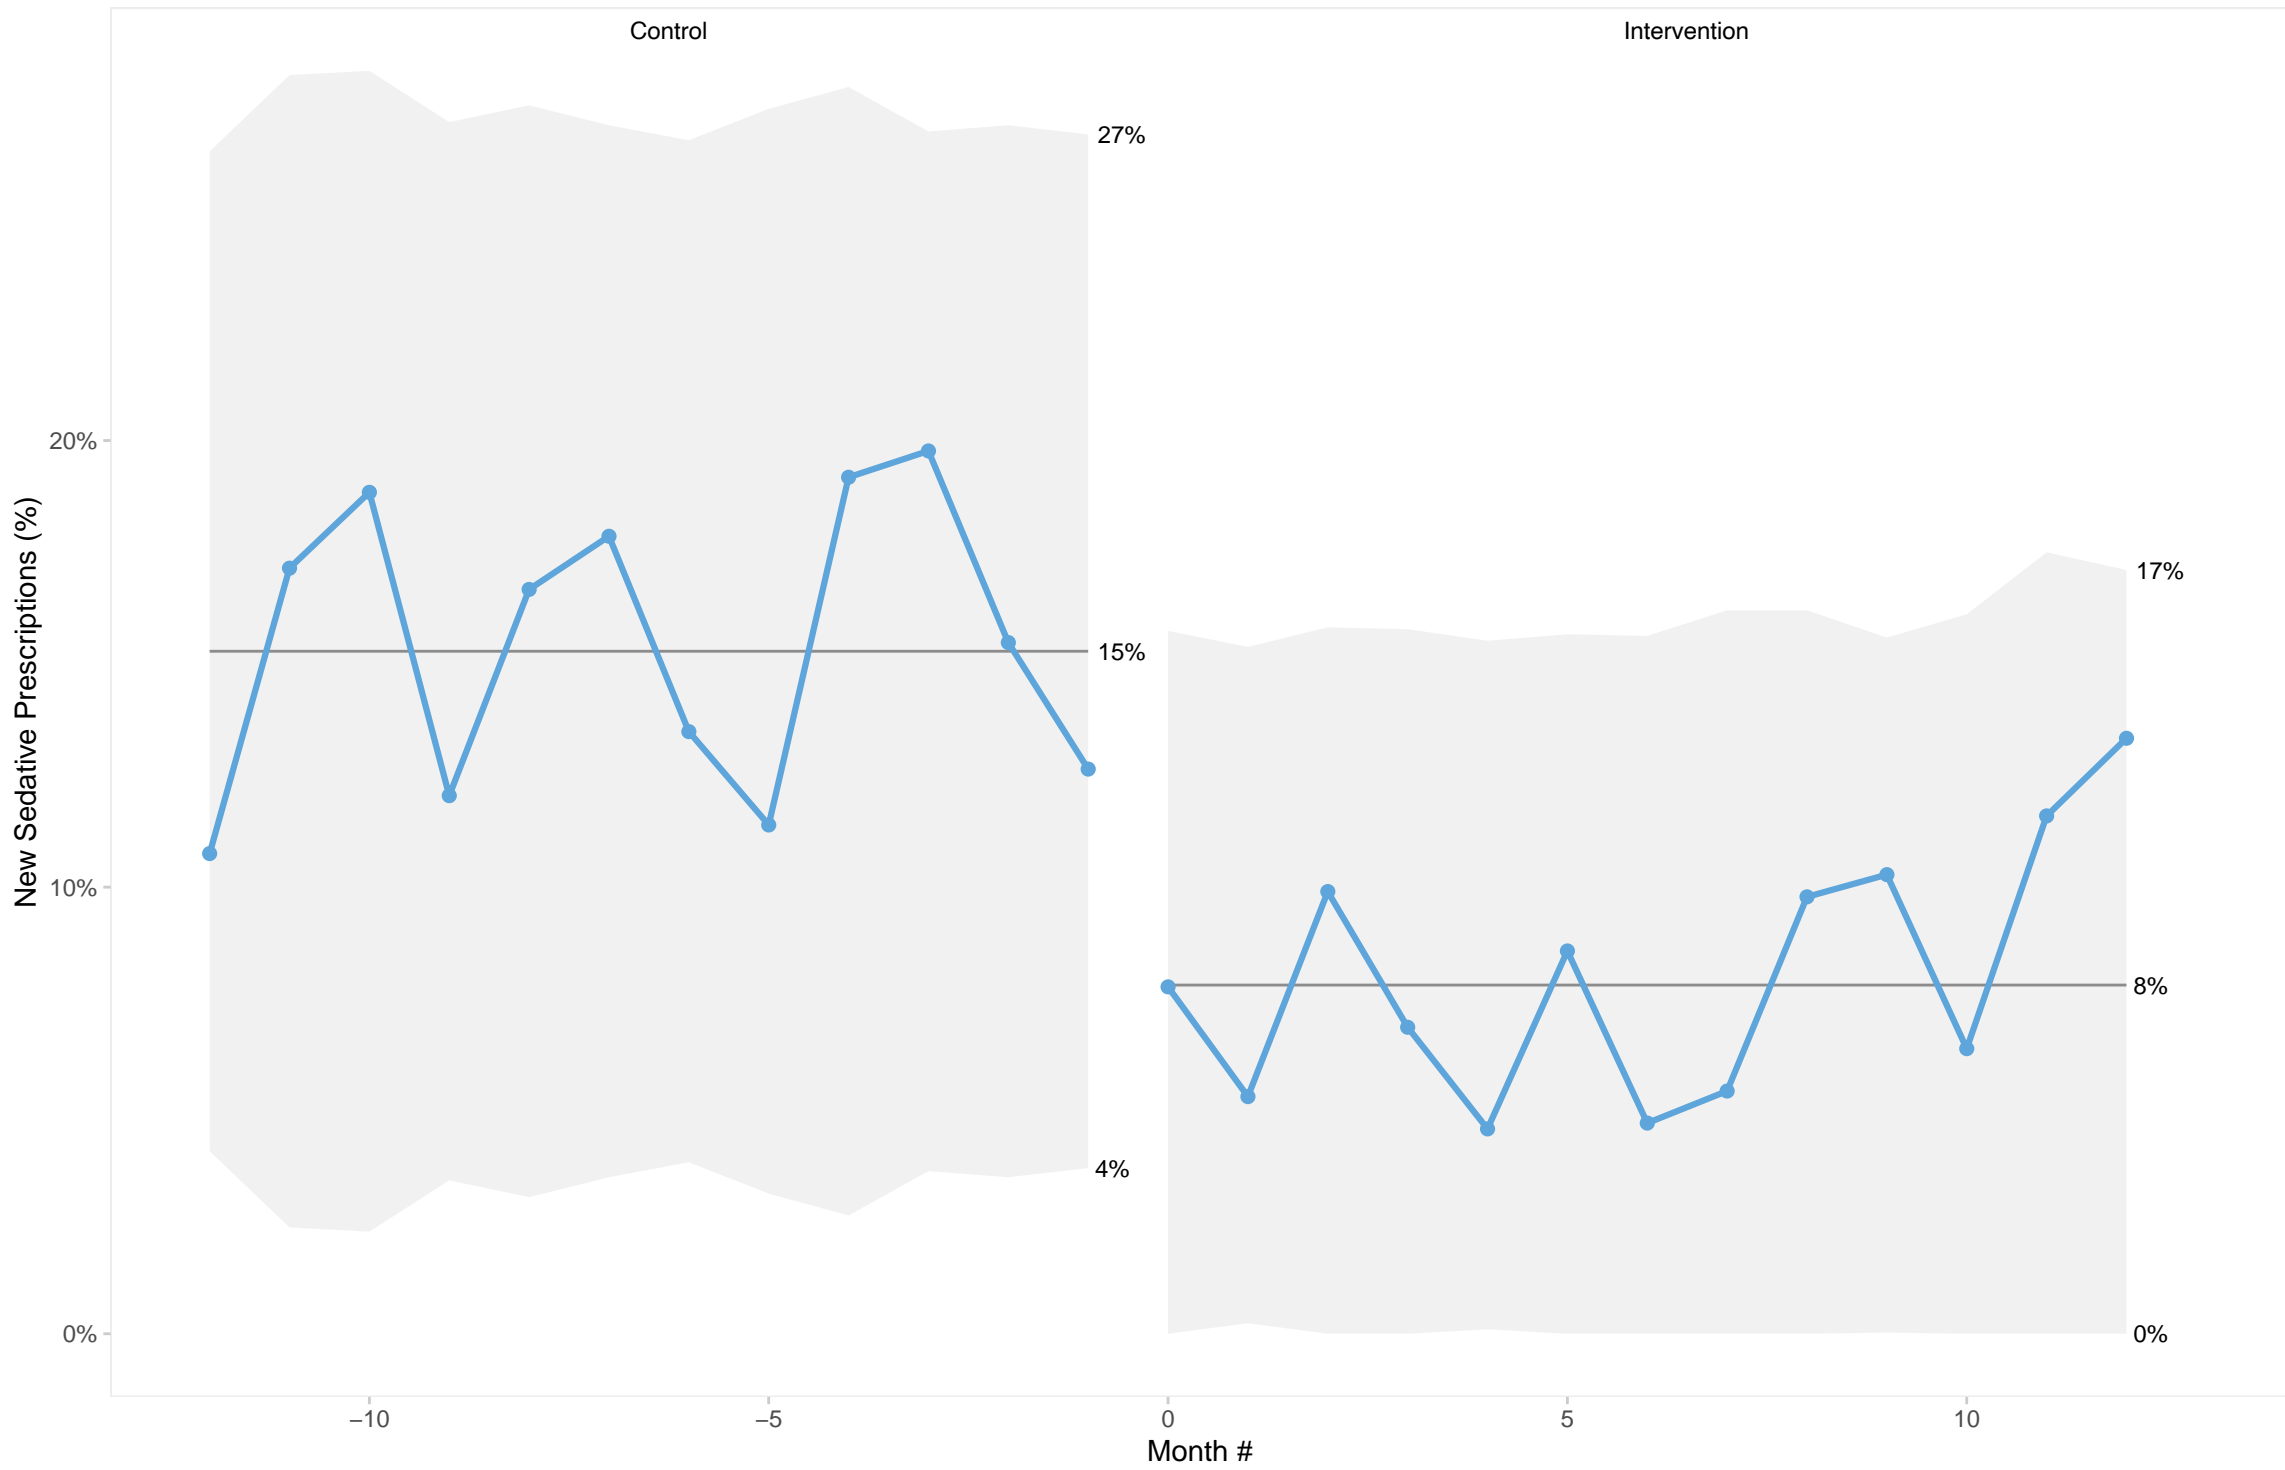

Hospital 2, ward A Statistical Process Control Chart of Proportion of Patients with New Sedative Starts in Control and Intervention periods

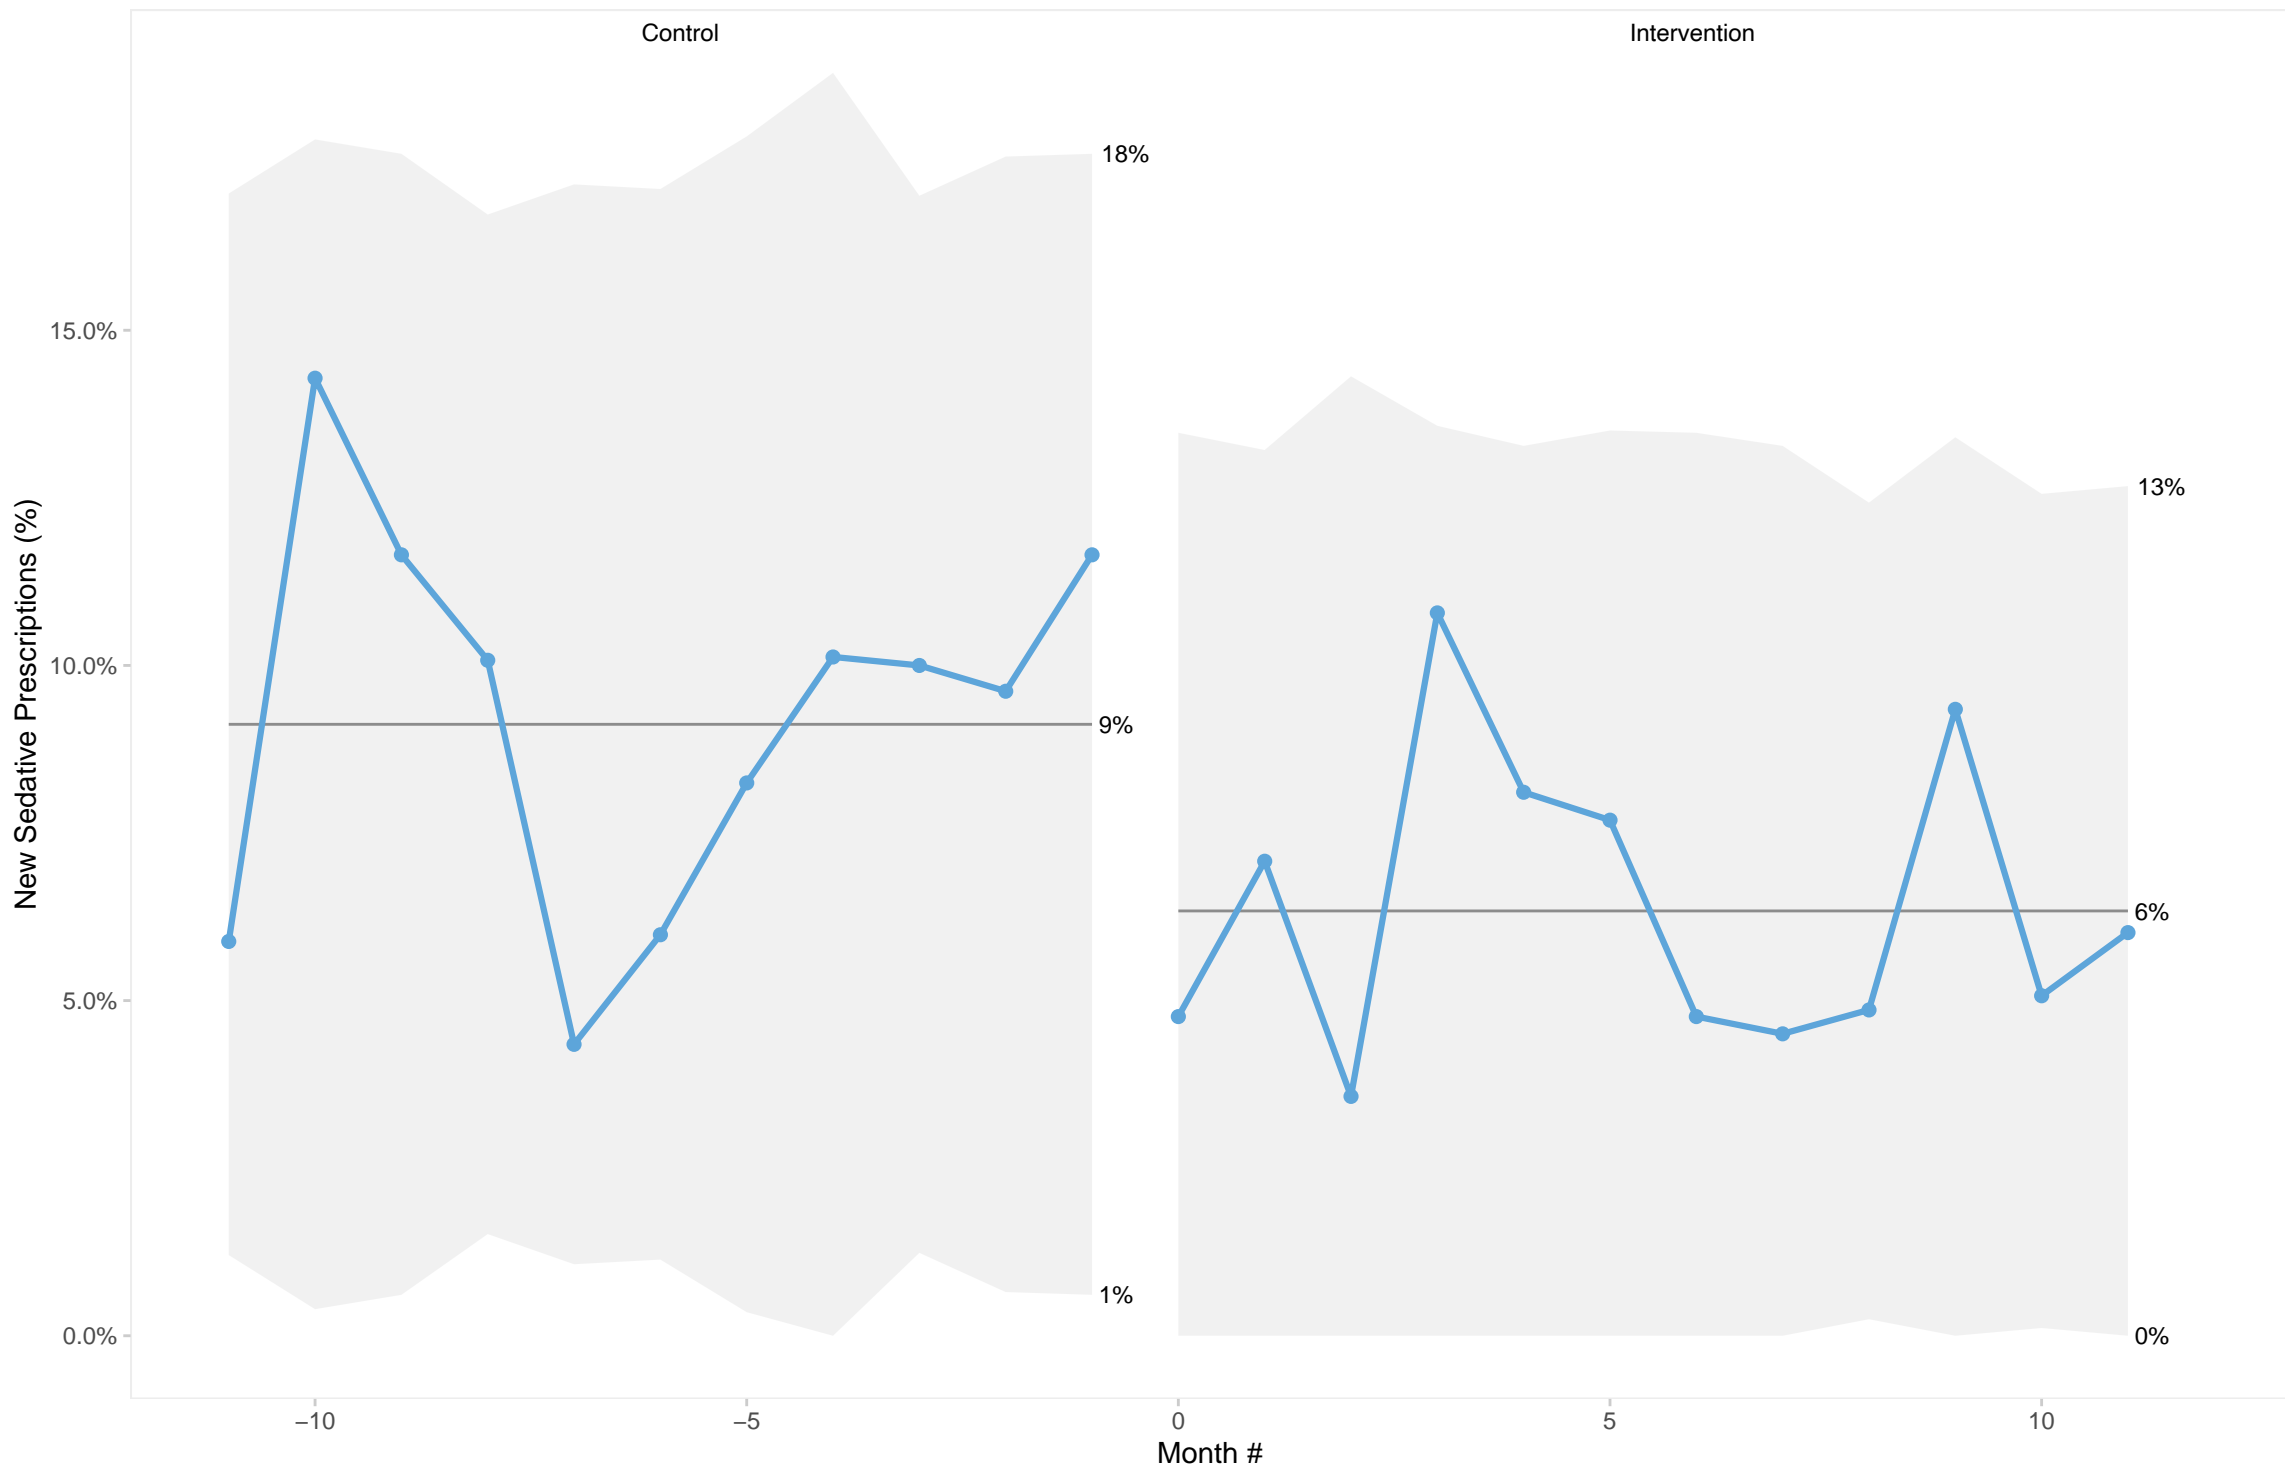

Hospital 2, ward B Statistical Process Control Chart of Proportion of Patients with New Sedative Starts in Control and Intervention periods

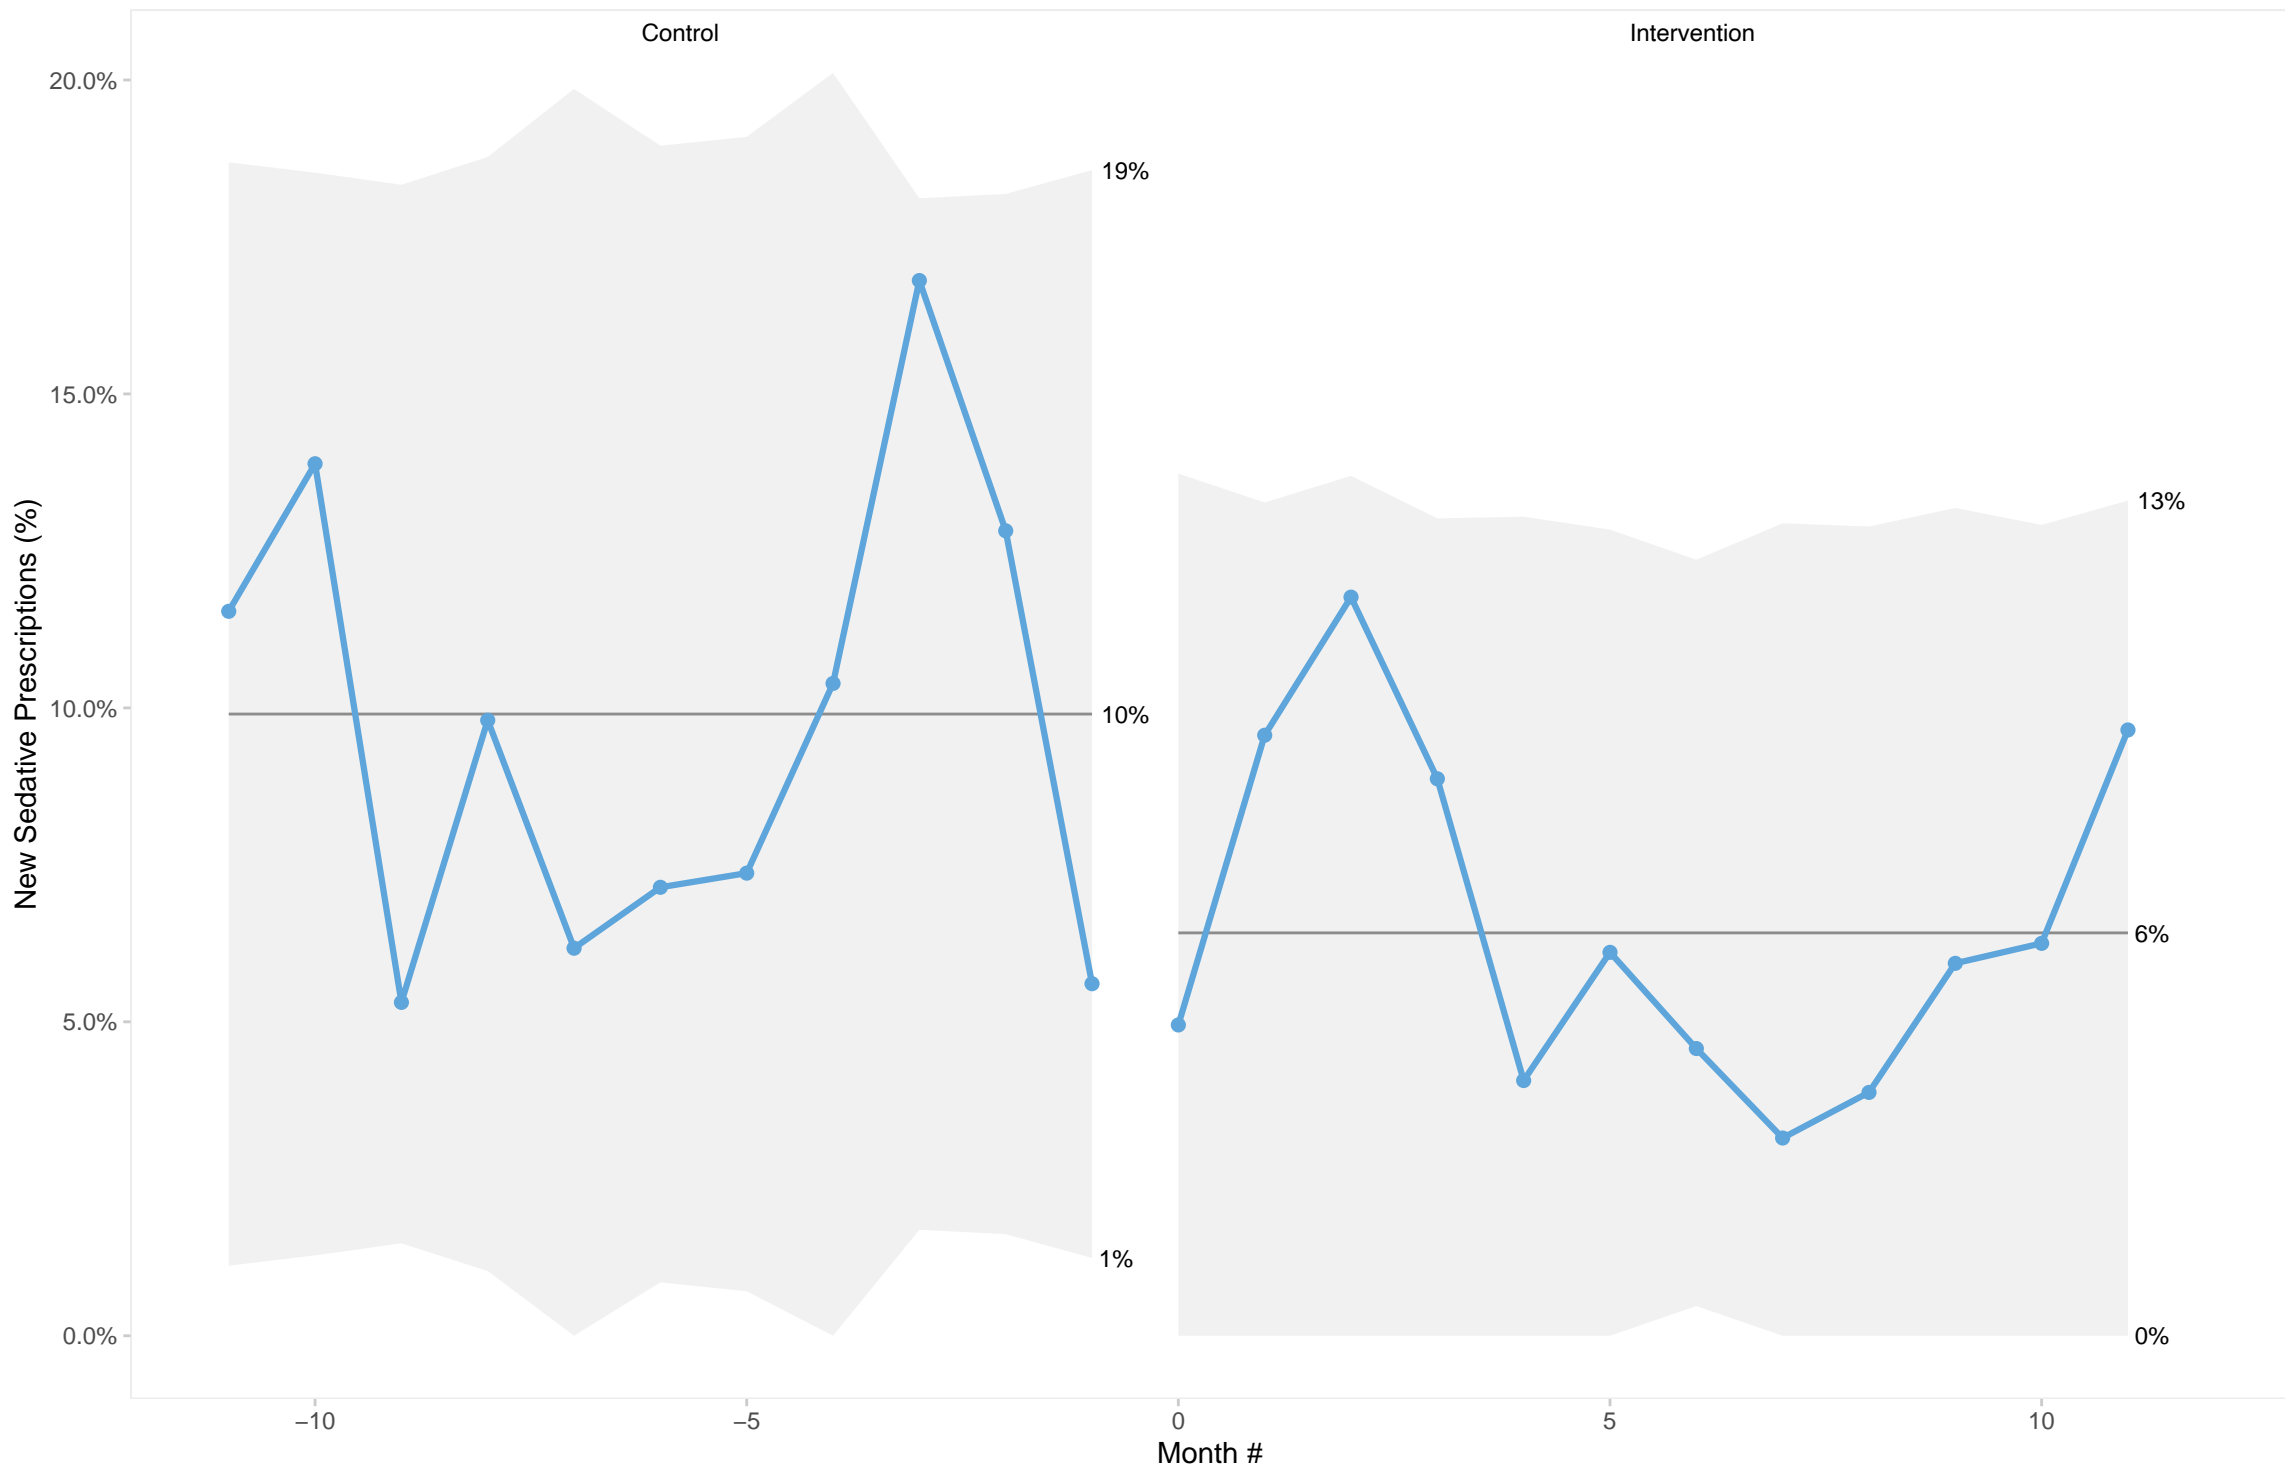

Hospital 3 Statistical Process Control Chart of Proportion of Patients with New Sedative Starts in Control and Intervention periods

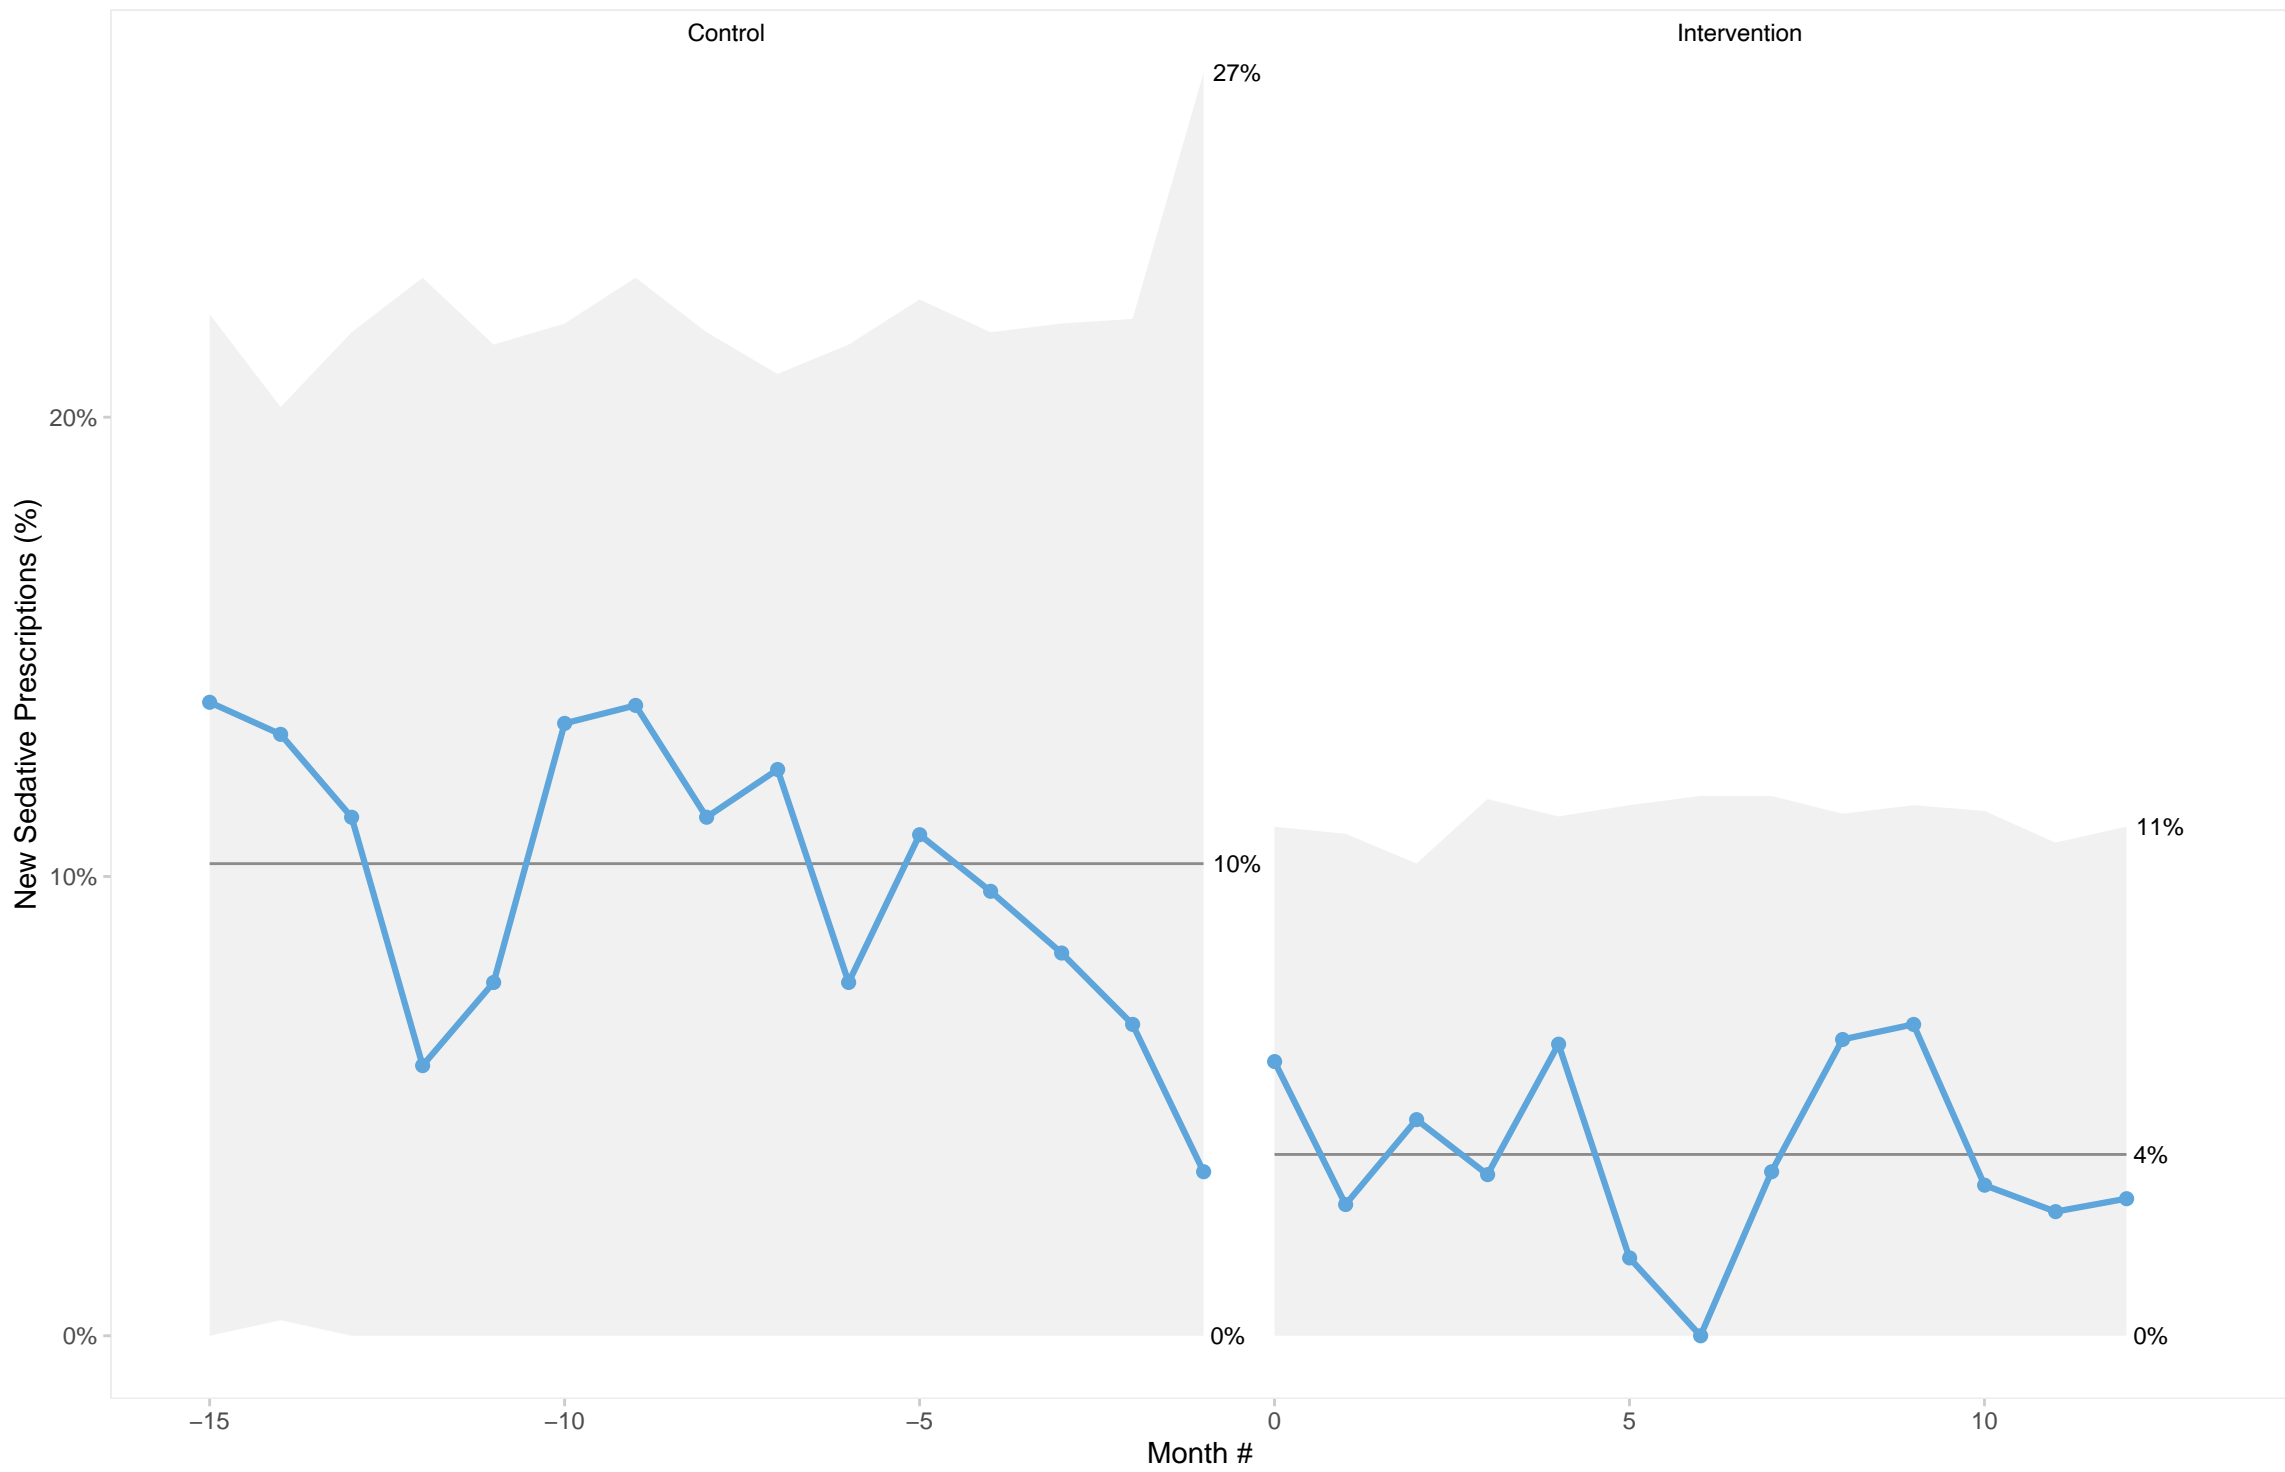

Hospital 4 Statistical Process Control Chart of Proportion of Patients with New Sedative Starts in Control and Intervention periods

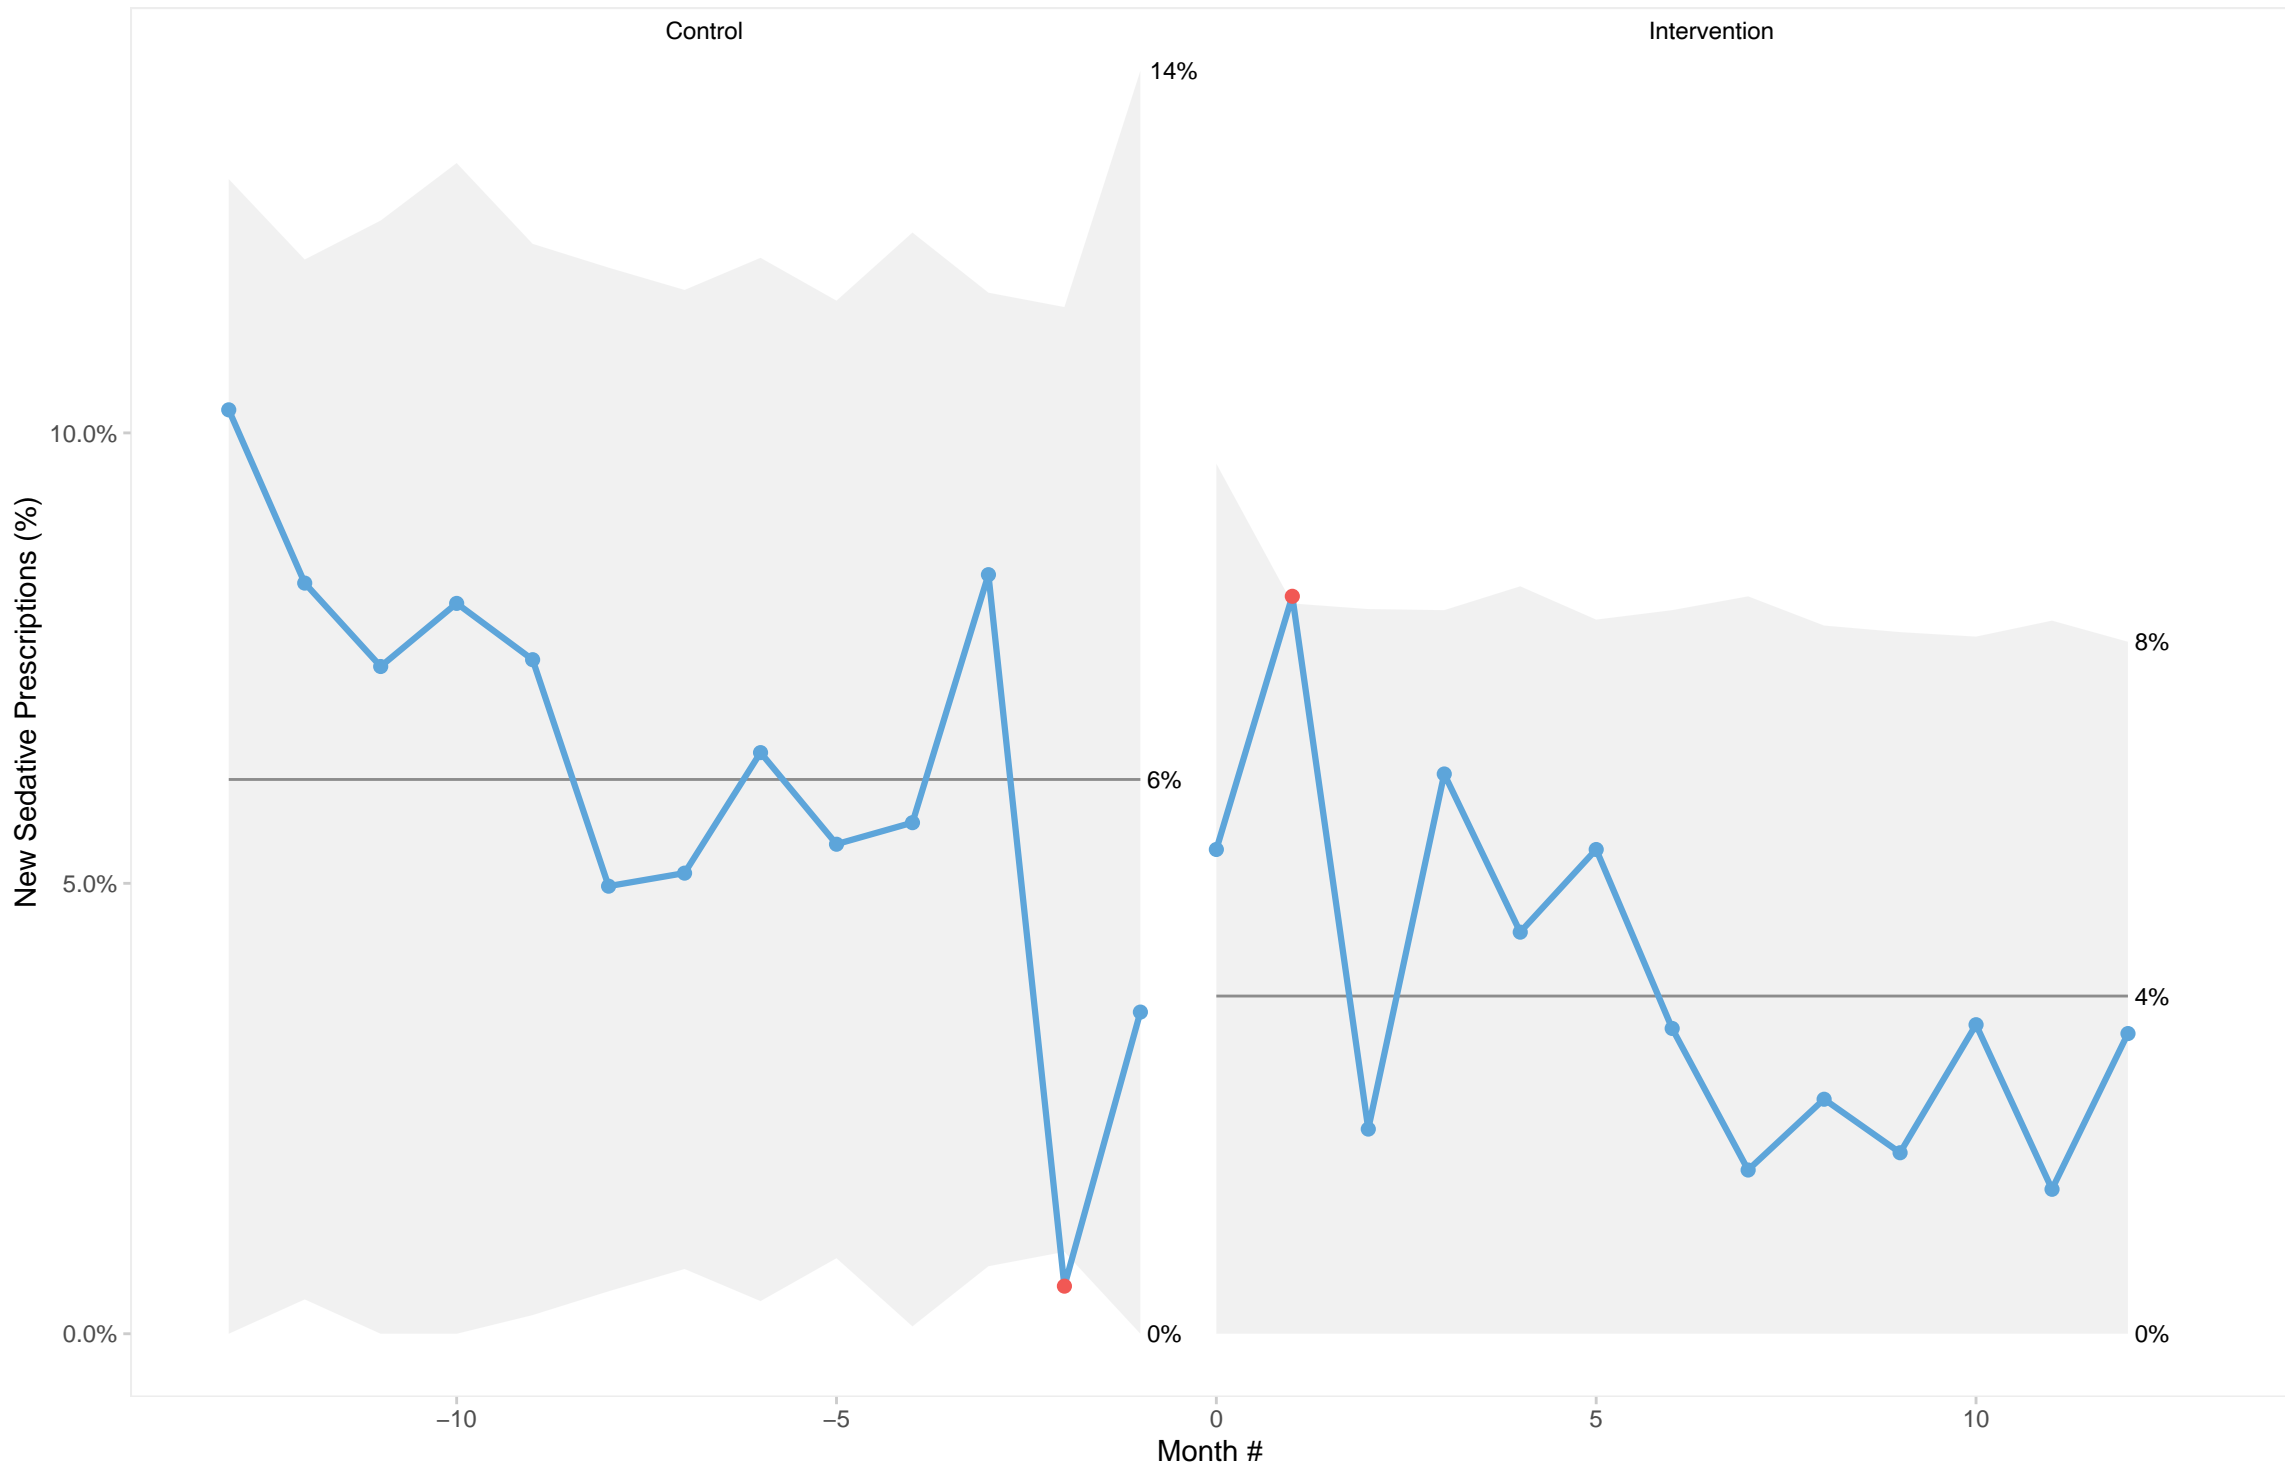

Hospital 5, ward A Statistical Process Control Chart of Proportion of Patients with New Sedative Starts in Control and Intervention periods

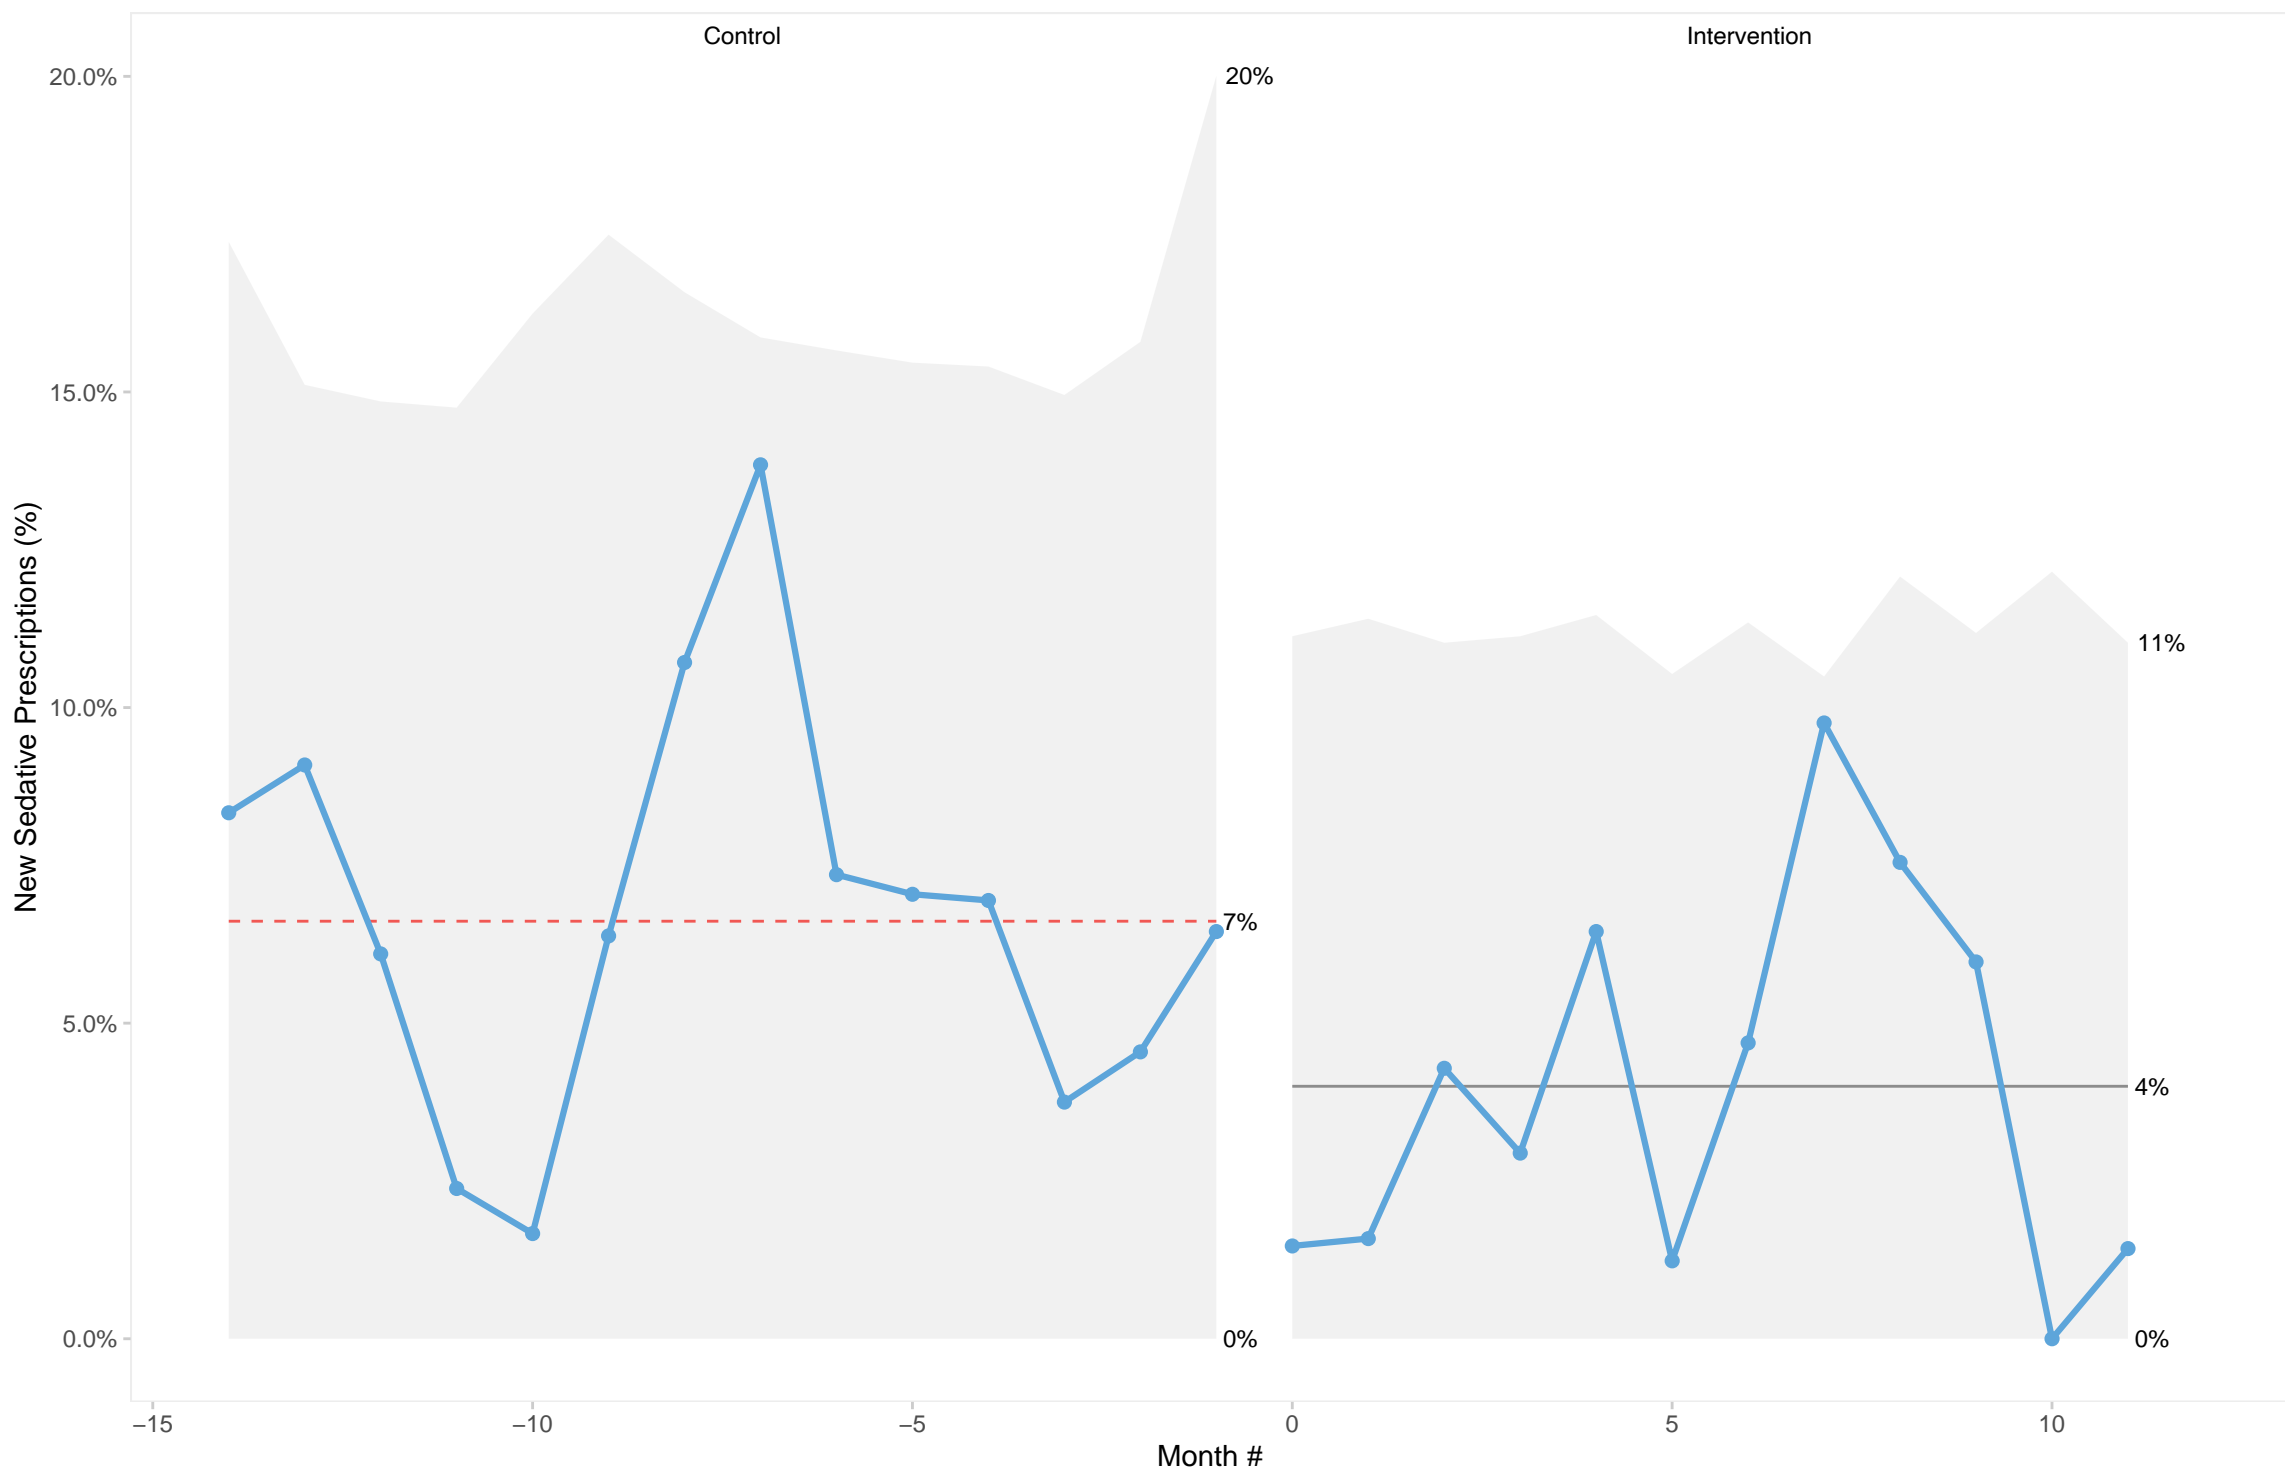

Hospital 5, ward B Statistical Process Control Chart of Proportion of Patients with New Sedative Starts in Control and Intervention periods

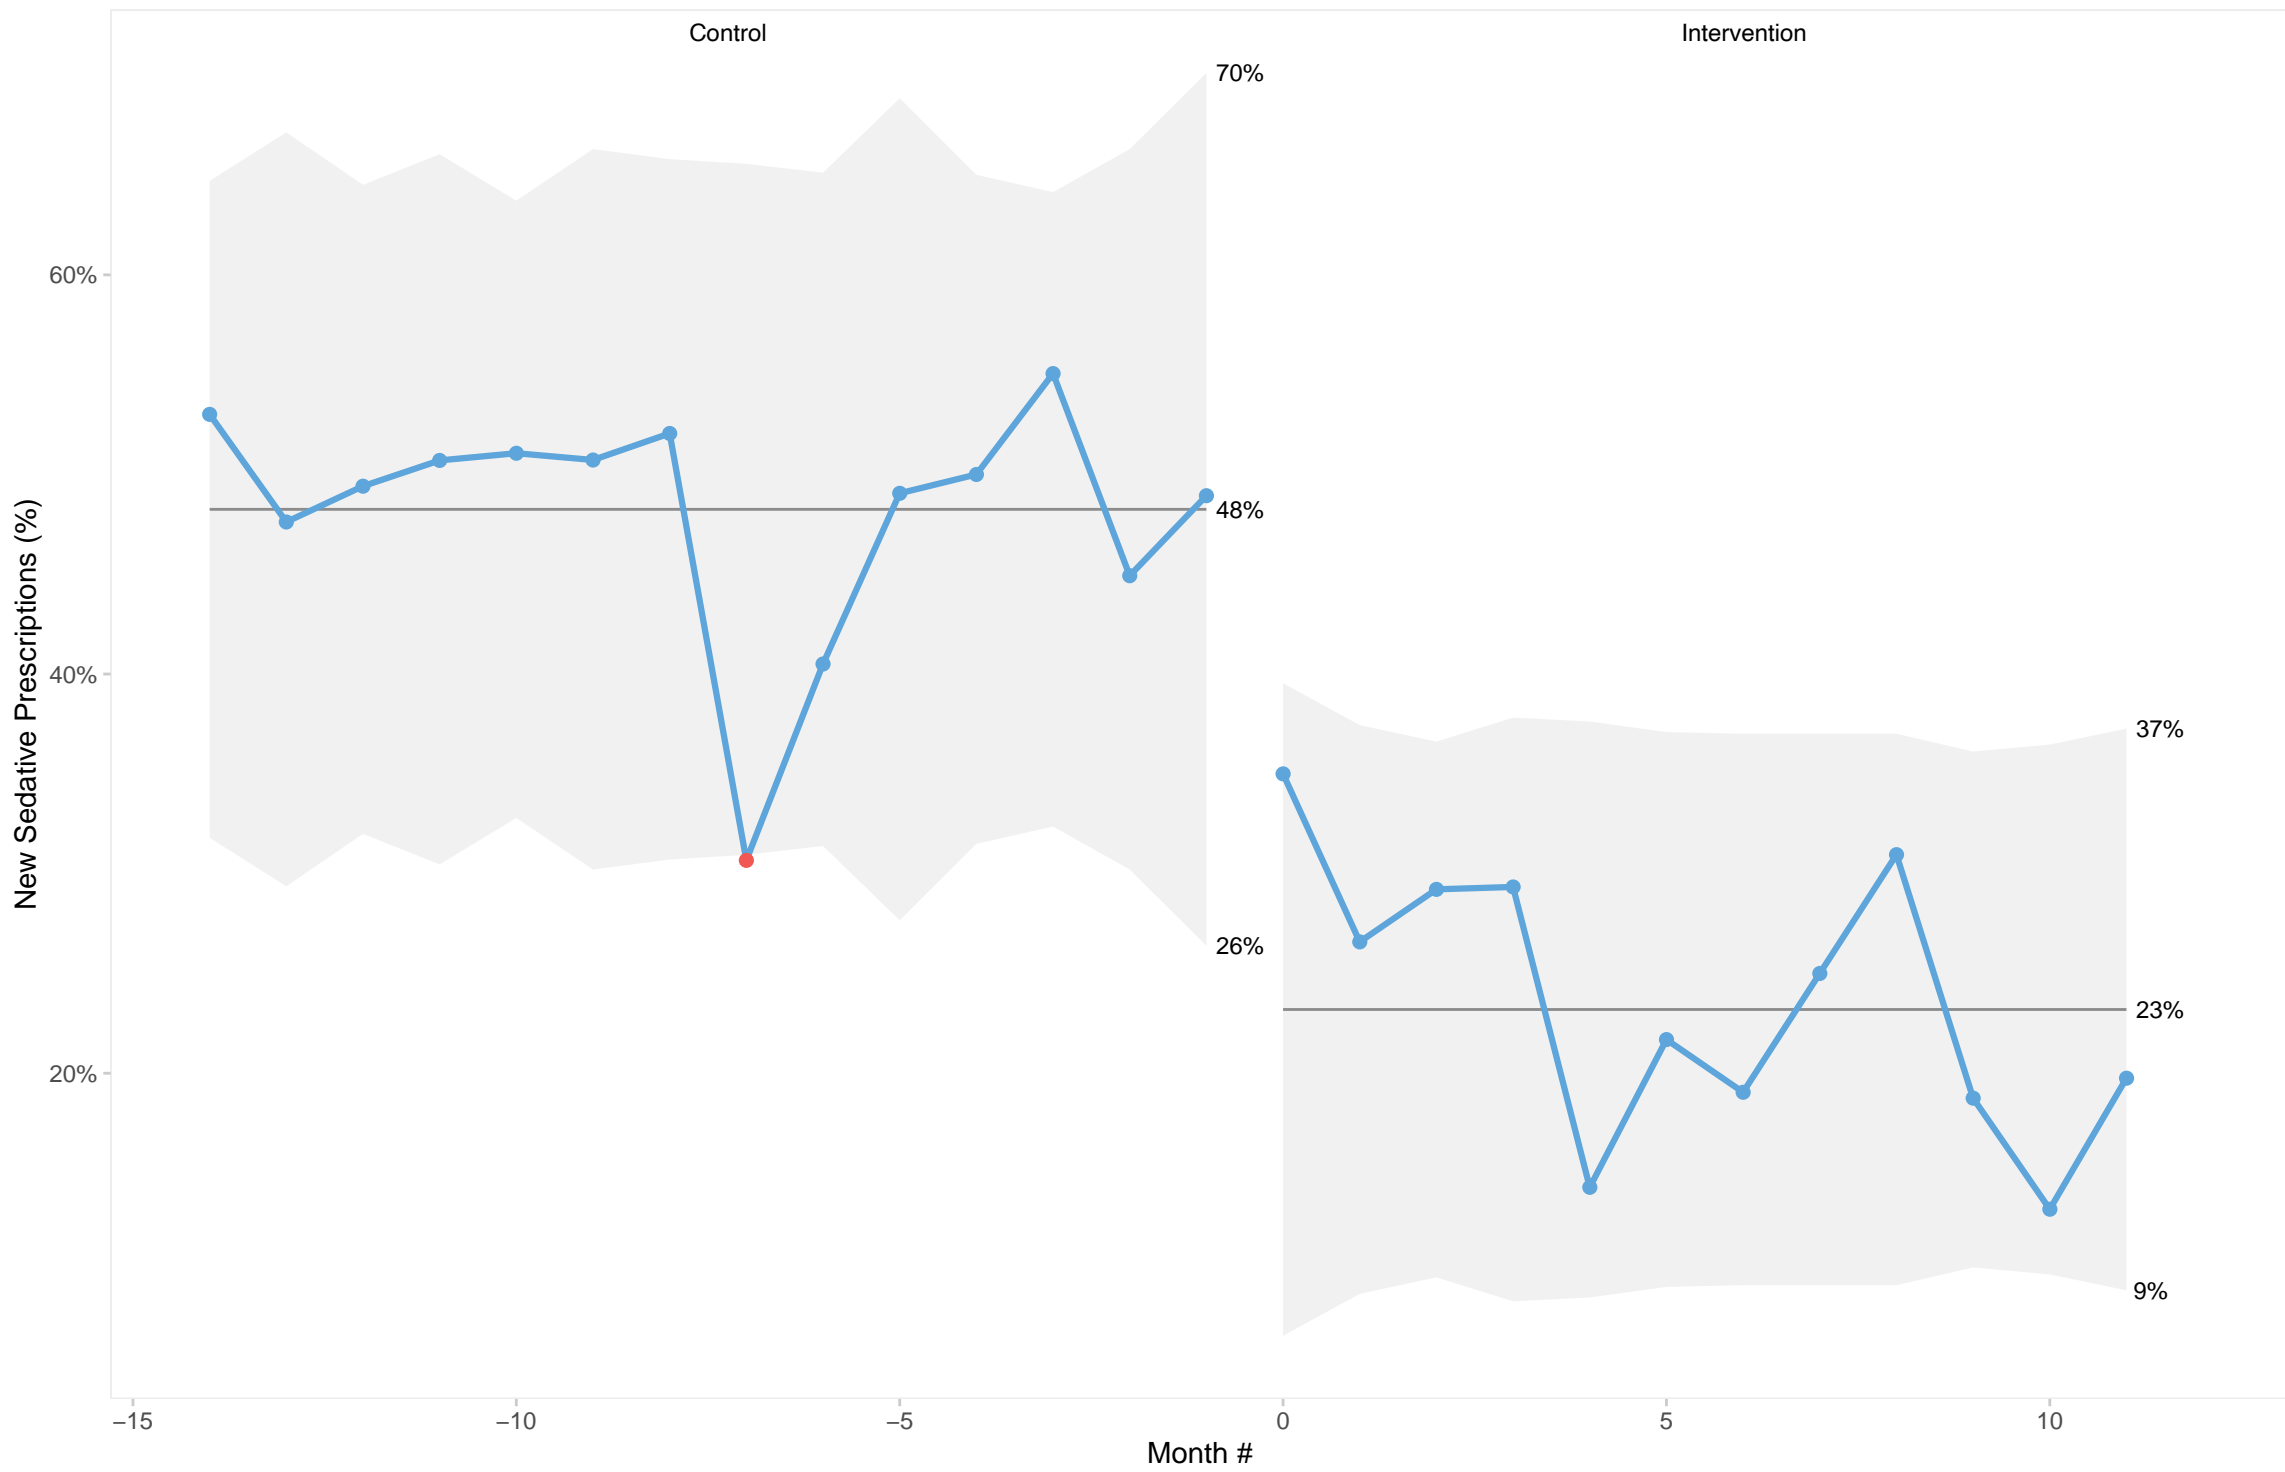

Supplement: 11606_2021_7292_MOESM5_ESM.pdf [file 11606_2021_7292_MOESM5_ESM.pdf]
